1 **Genome-wide trans-ethnic meta-analysis identifies**  
2 **novel susceptibility loci for childhood acute**  
3 **lymphoblastic leukemia**

4 Soyoung Jeon<sup>1,2</sup>, Adam J. de Smith<sup>1</sup>, Shaobo Li<sup>1,2</sup>, Minhui Chen<sup>1</sup>, Ivo S. Muskens<sup>1</sup>, Libby M.  
5 Morimoto<sup>3</sup>, Andrew T. DeWan<sup>4,5</sup>, Nicholas Mancuso<sup>1,6,7</sup>, Catherine Metayer<sup>3</sup>, Xiaomei Ma<sup>5,8</sup>,  
6 Joseph L. Wiemels<sup>1</sup>, Charleston W.K. Chiang<sup>1,6</sup>

7 Affiliations:

- 8 1. Center for Genetic Epidemiology, Department of Preventive Medicine, Keck School of Medicine,  
9 University of Southern California, Los Angeles, CA  
10 2. Cancer Biology and Genomics Graduate Program, Program in Biological and Biomedical Sciences,  
11 Keck School of Medicine, University of Southern California, Los Angeles, CA  
12 3. Division of Epidemiology & Biostatistics, School of Public Health, University of California,  
13 Berkeley, CA  
14 4. Center for Perinatal, Pediatric and Environmental Epidemiology, Yale School of Public Health,  
15 New Haven, CT  
16 5. Department of Chronic Disease Epidemiology, Yale School of Public Health, New Haven, CT  
17 6. Department of Quantitative and Computational Biology, University of Southern California, Los  
18 Angeles, CA  
19 7. Norris Comprehensive Cancer Center, Keck School of Medicine, University of Southern California,  
20 Los Angeles, CA  
21 8. Yale Cancer Outcomes, Public Policy, and Effectiveness Research (COPPER) Center, Yale  
22 University, New Haven, CT

23 Correspondence: J.L.W. ([wiemels@usc.edu](mailto:wiemels@usc.edu)), C.W.K.C. ([charleston.chiang@med.usc.edu](mailto:charleston.chiang@med.usc.edu))

24 **ABSTRACT**

25 The incidence patterns of childhood acute lymphoblastic leukemia (ALL) differ across ethnic  
26 groups but have been studied mostly in populations of predominantly European ancestries. Risk  
27 variants identified from previous genome-wide association studies (GWAS) do not fully explain  
28 heritable risk. In an effort to address these limitations, we performed a meta-analysis of ALL in  
29 76,317 participants across four ethnic groups, including 17,814 non-European individuals and  
30 3,482 total cases. We generally replicated previously identified loci associated with ALL (15 out  
31 of 16 loci replicated after Bonferroni corrections). We further identified five novel associations  
32 at genome-wide significance, including three novel loci and two secondary associations at  
33 previously known loci (17q12 and near *CEBPE*). The three putatively novel loci (rs9376090 near  
34 *MYB/HBS1L* on chr6q23.3, rs10998283 near *TET1* on chr10q21.3, and rs9415680 near  
35 *JMJD1C/NRBF2* on chr10q21.3) were previously shown to be associated with multiple blood  
36 cell traits and other hematopoietic cancers. When trans-ethnic information is used, polygenic risk  
37 scores constructed from GWAS loci in our trans-ethnic meta-analysis showed similar efficacy in  
38 independent Latino (LAT) and non-Latino white (NLW) ALL cohorts (AUC ~ 0.67-0.68) and  
39 could partly explain the increased risk of ALL in LAT compared to NLW. Cross-population  
40 analysis also showed high but significantly less than 100% genetic correlation between LAT and  
41 NLW, suggesting potential differences in the underlying genetic architecture between ethnic  
42 groups. In summary, our findings enhance the understanding of genetic contribution to ALL risk  
43 across diverse populations and highlight the importance to include multiple ethnic groups in  
44 GWAS.

## 45 INTRODUCTION

46 Acute lymphoblastic leukemia (ALL) is the most common type of childhood cancer worldwide,  
47 with substantial racial and ethnic differences in incidence and treatment outcome<sup>1,2</sup>. Previous  
48 genome-wide association studies (GWAS) have confirmed the genetic basis of ALL  
49 susceptibility by identifying a number of risk loci that confer risk of childhood ALL including in  
50 *ARID5B*, *IKZF1*, *CEBPE*, *CDKN2A*, *PIP4K2A*, *LHPP* and *ELK3*, among others<sup>3-8</sup>. However,  
51 these studies were generally composed of participants with a predominantly European ancestry,  
52 and efforts to replicate these findings in other ethnic groups have been limited, leading to a gap  
53 in our understanding of the genetic architecture of ALL in non-European populations. For  
54 example, among major ethnic groups in the United States, Latino children have the highest risk  
55 of ALL, with an incidence rate ~15-40% higher than in non-Latino whites<sup>9-11</sup>, and an increased  
56 chance of relapse and poorer overall survival<sup>12,13</sup>. Yet, individuals outside of the non-Latino  
57 white group (Latinos, African Americans and Asians) are generally underrepresented in GWAS,  
58 with the exception of recent efforts for childhood ALL in Latinos<sup>14-16</sup>. While environmental or  
59 social factors likely underlie some if not the majority of the differences in risk between ethnic  
60 groups, there may also be a difference in the genetic risk architecture of the disease across ethnic  
61 groups.

62  
63 The previously identified risk loci for ALL are generally common (except for a low frequency  
64 missense variant in *CDKN2A*<sup>17</sup>) in European ancestry populations. The heritability of ALL was  
65 estimated to be 21% in the European ancestry population, but the known risk loci together  
66 account for a relatively small portion of the total variance in genetic risk of ALL<sup>18</sup>. This suggests  
67 that additional susceptibility alleles may yet to be discovered in larger genetic studies of ALL.  
68 Moreover, polygenic risk scores (PRS) hold great promise for preventive risk assessment and  
69 stratification in a population, but are known to be poorly transferred to non-European  
70 populations<sup>19</sup>. It has been shown that PRS derived from multi-ethnic GWAS summary statistics  
71 would be more transferrable between populations, since multi-ethnic designs are more effective  
72 to identify alleles with shared effects across population without explicit fine-mapping<sup>20,21</sup>.

73  
74 Given this context, we performed a trans-ethnic GWAS of childhood ALL in a discovery panel  
75 consisting of 76,317 individuals from a multi-ethnic cohort derived from the California birth  
76 population and Kaiser's Cohort for Genetic Epidemiology Research on Aging. Our cohort  
77 consisted of 3,482 cases and 72,835 controls for an effective sample size of 13,292 (Methods).  
78 We note the complexity of discussing race, ethnicity and ancestry in a genetic study. As a  
79 convention, we used the following term and abbreviations to refer to each ethnic group in our  
80 study: African American (AFR), East Asian (EAS), Latino American (LAT), and non-Latino  
81 white (NLW). These population labels are largely based on self-reported ethnic identity and we  
82 confirmed that they largely correlate with genetic ancestry as defined by the reference  
83 populations in 1000 Genomes<sup>22</sup> (Methods). To our knowledge, this is the largest trans-ethnic  
84 GWAS for ALL to date. We identified three novel ALL risk loci and tested the novel findings  
85 from our discovery panel in two independent cohorts with cases from the California Childhood  
86 Leukemia Study and the Children's Oncology Group cohort. We further compared the efficacy  
87 of PRS to stratify individuals based on their risk of ALL in the two largest subgroups of our data,  
88 LAT and NLW, and contrasted the genetic architecture of ALL between them.

89

## 90 SUBJECTS AND METHODS

### 91 Study Subjects in Discovery Cohort

92 The California Childhood Cancer Record Linkage Project (CCRLP) includes all children born in  
93 California during 1982-2009 and diagnosed with ALL at the age of 0-14 years per California  
94 Cancer Registry records. Children who were born in California during the same period and not  
95 reported to California Cancer Registry as having any childhood cancer were considered potential  
96 controls. For each case, one control subject was randomly selected from a pool of potential  
97 controls and matched to case on year and month of birth, sex (56% male, 44% female), and  
98 ethnicity. A detailed information on sample preparation and genotyping has been previously  
99 described.<sup>4</sup> Furthermore, because ALL is a rare childhood cancer, for the purpose of a genetic  
100 study we incorporated additional controls using adult individuals from the Kaiser Resource for  
101 Genetic Epidemiology Research on Aging Cohort (GERA). The GERA cohort was chosen  
102 because a very similar genotyping platform had been used: Affymetrix Axiom World arrays. The  
103 GERA genotype information was downloaded from dbGaP (Study Accession: phs000788.v1.p2).

### 104 105 Data Processing and Quality Control

106  
107 The quality control (QC) on single nucleotide polymorphism (SNP) array genotypes and samples  
108 were carried out in each population and dataset in parallel, performed in two stages: pre-  
109 imputation and post-imputation. In pre-imputation QC, the sex chromosomes were excluded, and  
110 SNPs were filtered out on the basis of call rate ( $<98\%$ ), minor allele frequency ( $MAF < 0.01$ ),  
111 genome-wide relatedness ( $PI\_HAT > 0.02$ ), genome heterozygosity rate (mean heterozygosity  $\pm$   
112  $6Std$ ), and deviation from Hardy-Weinberg equilibrium in controls ( $P < 10^{-5}$ ). Samples with call  
113 rate  $< 95\%$  were also removed. In general, individuals were included in each of the four ethnic  
114 groups based on their self-reported ethnicity. We did not attempt to reassign individuals to  
115 different ethnic groups based on estimated genetic ancestry. We did perform principal  
116 components analysis for each population including our study subjects along with 1000 Genomes  
117 Project reference data<sup>22</sup> to identify extreme outlier individuals that clustered apart from other  
118 individuals in their self-reported race/ethnicity groups: this identified a small subset of  
119 individuals (29 cases and 51 controls from CCRLP, 31 individuals from GERA) among self-  
120 reported Asians (total  $n=722$ ) that clustered with South Asian reference individuals, as well as 5  
121 self-reported African American individuals out of  $n=3572$  from the GERA cohort that clustered  
122 with East Asian reference individuals. These appear to result from a lack of finer-scale ethnic  
123 labels for self-report, or a mis-labeling of individual records, and these individuals were dropped  
124 from our analysis.

125  
126 To control for potential batch effect and systematic bias between array types, we performed two  
127 separate GWASs. First, stratified by ethnicity and restricted to post-QC SNPs in both CCRLP  
128 and GERA, we compared CCRLP controls and GERA individuals. Second, using the GERA  
129 NLW cohort we compared individuals that were genotyped on the Axiom type “A” to those  
130 genotyped on the type “O” reagent kit (NLW was the only cohort in GERA that was genotyped  
131 using both reagent kits). Twenty principal components (PCs) were included as covariates of the  
132 logistic regression. In both comparisons we observed inflation of the test statistics suggesting a  
133 subset of SNPs exhibited evidence of batch effect, thus we removed variants with  $P < 0.01$  in any  
134 of the comparisons from all populations.

135  
136 We then performed genome-wide imputation with the overlapping set of remaining SNPs (N =  
137 431,543 in AFR, 259,468 in EAS, 547,575 in LAT and 362,977 in NLW) in each dataset using  
138 Haplotype Reference Consortium (HRC v r1.1 2016) as a reference in the Michigan Imputation  
139 Server<sup>23</sup>. The different number of SNPs passing QC and used in imputation reflects the fact that  
140 each ethnic group in CCRLP was genotyped using Affymetrix World arrays optimized for the  
141 Latino population (i.e., Axiom LAT array). In post-imputation QC, we filtered variants in each  
142 ethnic group by imputation quality ( $R^2 < 0.3$ ), MAF ( $< 0.01$ ), and allele frequency difference  
143 between non-Finnish Europeans in the Genome Aggregation Database (gnomAD)<sup>24</sup> and CCRLP  
144 NLW controls ( $> 0.1$ ). We next performed another GWAS between CCRLP controls and GERA  
145 individuals, and removed variants with  $P < 1 \times 10^{-5}$ . In principal components analysis using  
146 imputed data, we identified and removed 31 individuals in GERA LAT that were extreme  
147 outliers after imputation in PCs 1 to 20. Stratified by ethnicity, the CCRLP and GERA datasets  
148 were then merged to perform GWAS of ALL. In total, 124, 318, 1878, 1162 cases and 2067,  
149 5017, 8410, 57341 controls, in AFR, EAS, LAT and NLW, respectively were used in GWAS for  
150 ALL. An effective population was calculated using this equation:

$$N_{eff} = \frac{4}{\frac{1}{N_{cases}} + \frac{1}{N_{controls}}}$$

153  
154 where  $N_{eff}$  is the effective sample size,  $N_{cases}$  is the number of cases, and  $N_{controls}$  is the number of  
155 control subjects. A total of 7,628,894 SNPs that remained in at least three ethnic groups were  
156 tested in our GWAS discovery analysis.

### 157 **Association Testing in Discovery Cohort**

158 In each ethnic strata, we used SNPTEST<sup>26</sup> (v2.5.2) to test the association between imputed  
159 genotype dosage at each SNP and case-control status in logistic regression, after adjusting for the  
160 top 20 PCs. The result from the four ethnic-stratified analyses were combined via the fixed-effect  
161 meta-analysis with variance weighting using METAL<sup>25</sup>. Only variants passing QC in at least  
162 three of the four ethnic groups were meta-analyzed. A genome-wide threshold of  $5 \times 10^{-8}$  was  
163 used for significance. We also tested to ensure sex is not correlated with the genotype dosage of  
164 SNPs with  $P < 5 \times 10^{-7}$  in our meta-analysis, thus our results are not explained by sex as a  
165 confounder.

166 For replication of previously identified ALL risk loci, we focused on the variants within 1Mb of  
167 the previously reported susceptibility variants<sup>3-8,17,27,28</sup>. We report the association results of the  
168 published lead SNP as well as the top SNP at each locus from our meta-analysis. For replication  
169 of the known loci, a significance of 0.00312 ( $=0.05/16$ ) was used.

170 To identify secondary signals at each of the three putatively novel and 16 previously known risk  
171 loci, we performed multivariate conditional analysis adjusting for the lead SNP and 20 PCs. A  
172 second round of conditional analyses conditioning on the top and the second top SNP resulted in  
173 no additional SNPs reaching genome-wide significance at any of the loci examined. A genome-  
174 wide threshold of  $5 \times 10^{-8}$  was used for significance.

175



## 176 **Association Testing in Replication Cohorts**

177  
178 We included two independent ALL case-control replication studies: (1) individuals of  
179 predominantly European ancestry from the Children’s Oncology Group (COG, [dbGAP  
180 accession number phs000638.v1.p1]) cohort as cases and from Wellcome Trust Case–Control  
181 Consortium<sup>29</sup> (WTCCC) as controls, genotyped on either the Affymetrix Human SNP Array 6.0  
182 (WTCCC, COG trials AALL0232 and P9904/9905) or the Affymetrix GeneChip Human  
183 Mapping 500K Array (COG P9906 and St. Jude Total Therapy XIII B/XV<sup>18</sup>); and (2) individuals  
184 of European and Latino ancestry from the California Childhood Leukemia Study (CCLS), a non-  
185 overlapping California case-control study (1995-2008).<sup>30</sup> The quality control procedures and  
186 imputation were performed in accordance with the discovery cohort. For COG and WTCCC,  
187 because self-identified ethnicity was not available to us, we performed global ancestry  
188 estimations using ADMIXTURE and the 1000 Genomes populations as reference and removed  
189 individuals with < 90% estimated European ancestry from the analysis. This resulted in 1504  
190 cases and 2931 controls from COG/WTCCC, and in the CCLS, 426 NLW cases, 278 NLW  
191 controls, 758 LAT cases and 549 LAT controls for our replication analysis. In each dataset, we  
192 tested the imputed SNP dosages in the three putatively novel loci with  $P < 5 \times 10^{-7}$  (number of  
193 SNPs=141) in logistic regression with top 20 PCs as covariates using PLINK<sup>31</sup> (v2.3 alpha).

## 195 **Polygenic Risk Score Analysis**

196 Polygenic risk scores (PRS) for ALL were constructed for each individual in CCLS LAT, NLW,  
197 and COG/WTCCC by summing the number of risk alleles, each weighted by its effect size from  
198 our discovery GWAS meta-analysis. PRS were constructed in two different ways: (1) a PRS with  
199 lead SNPs in the 16 known loci ( $N = 18$  SNPs, including variants from the two secondary signals  
200 in *IKZF1* and *CDKN2A/B* that were previously reported; for which we used the corresponding  
201 effect sizes from conditional analysis), and (2) a PRS including the novel hits (A total of 19 loci  
202 and 23 SNPs, including the additional 3 novel loci and 2 novel conditional associations). The  
203 lead SNPs in known loci included in both models were from this study. PRS was computed using  
204 PLINK (v2.0) where the effect size of each risk allele was multiplied by the genotype dosage and  
205 summed to generate a score for each sample. Associations between PRS and case-control status  
206 for ALL were tested in each group adjusting for 20 principal components using R. To evaluate  
207 the predictive power of PRS, Area Under the receiver operating characteristic Curve (AUC) were  
208 calculated using pROC package<sup>32</sup> in R.

## 210 **Heritability Estimates**

211 We estimated heritability ascribable to all post-QC imputed SNPs with  $MAF \geq 0.05$  in our  
212 GWAS data using the genome-wide complex trait analysis software (GCTA)<sup>33</sup>. We followed the  
213 GCTA-LDMS approach to estimate heritability from imputed data<sup>34</sup>, which recommended  
214 stratifying SNPs into bins based on their LD scores and/or minor allele frequency. Using GCTA,  
215 we computed the genetic relationship matrix (GRM) of pairs of samples using SNPs in each bin,  
216 and used the multiple GRMs as input to obtain a restricted maximum likelihood (REML)  
217 estimate of heritability. All individuals in discovery analysis were used for LAT ( $n=10,288$ ). For  
218 computational efficiency and for maintaining a close balance in sample size to the LAT data, we  
219 randomly sampled 10,000 NLW GERA controls to be included with all of CCRLP NLW cases

220 and controls (total N = 12,391). We used a prevalence of  $4.41 \times 10^{-4}$  and  $4.09 \times 10^{-4}$  for childhood  
221 ALL in LAT and NLW respectively based on data from the Surveillance Research Program,  
222 (National Cancer Institute SEER\*Stat software version 8.3.8; <https://seer.cancer.gov/seerstat>) to  
223 convert the estimated heritability to the liability scale. Because the NLW are expected to be  
224 much better imputed using HRC than LAT, particularly at rare variants, our genome-wide  
225 imputed data potentially could be used to partition the contribution of low frequency ( $0.01 \leq$   
226  $MAF < 0.05$ ) and common ( $MAF \geq 0.05$ ) variants in NLW population. In this case, we  
227 performed GCTA-LDMS analysis in 8 strata: two MAF strata (low frequency and common) by  
228 four quartiles of LD score strata.

229 To measure genetic correlation between LAT and NLW, we used SNPs with  $MAF \geq 0.05$  in  
230 both populations to generate GRM using R as per Mancuso et al.<sup>35</sup> The individuals used in  
231 univariate REML for each ethnicity were used for the bivariate analysis (n=22,679). We used  
232 imputed dosage data to estimate GRM for each unique pair of ancestry groups as

$$233 \quad A = \frac{1}{m} \begin{bmatrix} Z_1 \\ Z_2 \end{bmatrix} \cdot \begin{bmatrix} Z_1 \\ Z_2 \end{bmatrix}^t$$

234 where m is number of SNPs and  $Z_1$  and  $Z_2$  are the standardized genotype matrices for LAT and  
235 NLW, respectively. We estimated genetic correlation using bivariate GREML in GCTA.

236

## 237 **Investigation of Genetic Architecture**

238 To quantify the extent to which latent causal variants for ALL are shared or population-specific  
239 between LAT and NLW, we analyzed our GWAS summary data using the tool PESCA<sup>36</sup>.  
240 Briefly, PESCA analyzes GWAS summary data from multiple populations jointly to infer the  
241 genome-wide proportion of causal variants that are population-specific or population-shared. For  
242 computational efficiency, PESCA requires first defining LD blocks that are approximately  
243 independent in both populations and assumes that a SNP in a given block is independent from all  
244 SNPs in all other blocks. We computed pairwise LD matrix in both NLW and LAT using ~329K  
245 directly genotyped SNPs shared in both populations. Then, following Shi et al.<sup>36</sup>, we generated  
246 the trans-ethnic LD matrix by using the larger  $r^2$  value of the NLW or LAT-specific pairwise LD,  
247 and used LDetect<sup>37</sup> to define LD blocks within the transethnic LD matrix. By setting mean LD  
248 block size to 200 SNPs and using default parameters, we obtained 1,653 blocks that are  
249 approximately independent, which is approximately similar to previous reports in East Asians  
250 and Europeans.<sup>36</sup> We then followed Shi et al. to estimate the numbers of population-specific and  
251 shared causal SNPs using PESCA<sup>36</sup>. We restricted our analysis to 1.3M SNPs with  $MAF > 0.05$ ,  
252  $r^2 < 0.95$ , and with summary association statistics available in both NLW and LAT. We first  
253 estimated the genome-wide proportion of population-specific and shared causal variants with the  
254 heritability estimated above (0.2033 and 0.0413 in NLW and LAT, respectively) using default  
255 parameters in PESCA, parallelizing the analysis in groups of 10 LD blocks at a time. Using the  
256 estimated genome-wide proportions of population-specific and shared causal variants as prior  
257 probabilities, we then estimated the posterior probability of each SNP to be causal in a single  
258 population (population-specific) or both populations (shared), and inferred the posterior expected  
259 numbers of population-specific/shared causal SNPs in each LD block by summing the per-SNP  
260 posterior probabilities of being causal in a single or both populations. Critically, while PESCA is

261 an analysis based on summary statistics and not designed for admixed populations, it can be  
262 applied to admixed population such as LAT if in-sample LD is used.<sup>36</sup>

### 263 **Familial risk per variant**

264 The percentage of familial relative risk (FRR) explained by each genetic variant was calculated  
265 as per Schumacher et al<sup>38</sup>5/7/2021 10:41:00 PM . The familial relative risk due to locus  $k$  ( $\lambda_k$ ) is  
266 given by

$$267 \lambda_k = \frac{p_k r_k^2 + q_k}{(p_k r_k + q_k)^2}$$

268 where  $p_k$  is the frequency of the risk allele for locus  $k$  in each population,  $q_k = 1 - p_k$ , and  $r_k$  is  
269 the estimated per-allele odds ratio from meta-analysis. The percentage of familial relative risk is  
270 calculated as  $\sum_k \log \lambda_k / \log \lambda_0$  where  $\lambda_0$  is the observed familial risk to first-degree relatives of  
271 ALL cases, assumed to be 3.2 as per Kharazmi et al.

272

## 273 **RESULTS**

### 274 **Trans-ethnic Genetic Associations with ALL**

275 We performed a trans-ethnic meta-analysis GWAS for childhood ALL. After quality control  
276 filtering, our dataset consisted of 3,482 cases and 72,835 controls (124 cases/ 2,067 controls in  
277 AFR, 318 cases/5,017 controls in EAS, 1,878 cases/ 8,410 controls in LAT, 1,162 cases/ 57,341  
278 controls in NLW; see Materials and Methods) in total. Compared to the previous trans-ethnic  
279 analysis, we included additional controls for NLW, added data from EAS population. In  
280 addition, we also tested the association at a total of 7,628,894 SNPs after imputation using the  
281 Haplotype Reference Consortium reference panel (HRC v r1.1.2016). We aggregated the  
282 summary statistics across the four ethnic groups in a fixed-effect meta-analysis. The genomic  
283 control inflation factor was 1.023 (1.022 after removing 16 previously known ALL-associated  
284 loci, Table 1), suggesting our meta-analysis was not impacted by uncontrolled confounding due  
285 to population stratification (Figure 1). Twelve loci reached genome-wide significance (i.e,  $P <$   
286  $5.0 \times 10^{-8}$ ).

287

288 We first examined the evidence of association at 16 previously published risk loci for ALL<sup>3-  
289 8,16,18,27,28</sup> . Across the 16 loci, all replicated at the nominal level ( $P < 0.05$ ) or have a SNP nearby  
290 with strong association (Table 1), including nine that reached genome-wide significance. Note  
291 that out of the 16 loci, three(8q24.21, *IKZF3*, and *BMII*) were initially identified and five  
292 (*IKZF1*, *PIP4K2A*, *ARID5B*, *CDKN2A*, *CEBPE*) were previously shown to be replicated using a  
293 smaller but largely overlapping subset of this dataset<sup>4,28</sup>. For these loci, our findings here would  
294 not necessarily constitute an independent replication. In some cases, the published SNP is not the  
295 SNP with the most significant association in our dataset, though usually our top SNP in the locus  
296 is in strong LD with the reported SNP (Table 1). Interestingly, at the *C5orf56* locus on 5q31  
297 previously identified in an independent cohort of predominantly European ancestry, the reported  
298 variant (rs886285) was not nominally significant ( $P = 0.63$ ) in our dataset, presumably due to  
299 this SNP being associated with a particular subtype of ALL (HD-ALL)<sup>18</sup>. Another SNP in the  
300 same locus approximately 20kb away (rs11741255) but in low LD ( $r^2 = 0.35$  in NLW, 0.19 in



301 LAT) was significantly associated with ALL in our data ( $P = 1.69 \times 10^{-4}$ ) but may reflect a chance  
302 association. At another locus (*TLE1* on 5q21), neither the published variant nor our top variant in  
303 the locus would be considered significantly associated after correcting for multiple testing of 16  
304 SNPs in this analysis (minimum  $P = 1.06 \times 10^{-2}$  for rs62579826), possibly due to heterogeneity  
305 driven by EAS in which both the published variant and our top variant are monomorphic<sup>24</sup>.  
306 Therefore, further characterization at these two loci is needed to determine whether there is a  
307 reproducible association signal to ALL and if so, which are the more likely causal variants.

308  
309 More importantly, we discovered three putatively novel susceptibility loci: one at 6q23 and two  
310 at 10q21 (Figure 1). The strongest association signal in 6q23 is at rs9376090 ( $P = 8.23 \times 10^{-9}$ ,  
311  $OR = 1.27$ ) in the intergenic region between *MYB* and *HBSIL* (Figure 2A). This association is  
312 mainly driven by NLW presumably due to its large sample size (Supplementary Table S1). In  
313 10q21, there were two independent signals that showed genome-wide significance. One locus  
314 was identified with the lead SNP rs9415680 ( $P = 7.27 \times 10^{-8}$ ,  $OR = 1.20$ ), within a broad  
315 association peak, with apparently long-range LD with SNPs covering *NRBF2*, *JMJDIC*, and  
316 parts of *REEP3* (Figure 2B). The second locus in 10q21 was identified 5Mb away, with lead  
317 SNP rs10998283 ( $P = 3.92 \times 10^{-8}$ ,  $OR = 1.15$ ) in an intronic region in *TET1* (Figure 2C). The  
318 association signals for both loci in 10q21 were largely driven by LAT. We used the convention  
319 of the nearest genes to refer to these loci for the remainder of the manuscript, acknowledging that  
320 they may not be the causal genes.

321  
322 To replicate the novel associations in independent datasets, we tested the associations of the  
323 three novel variants and their LD proxies (with  $P < 5 \times 10^{-7}$ ;  $n = 141$ ) in independent samples from  
324 COG/WTCCC NLW, and CCLS LAT and NLW. For the *MYB/HBSIL* locus, which was driven  
325 by NLW in the discovery cohort, we replicated the signal in COG/WTCCC cohort (rs9376090,  
326  $P_{COG} = 4.87 \times 10^{-3}$ ,  $P_{COG+discovery\ analysis} = 1.23 \times 10^{-10}$ ; Supplementary Table S2), but did not replicate  
327 in CCLS likely owing to the small sample size of NLW. For the *TET1* locus, in which the  
328 original association was driven by LAT in the discovery, three of the four SNPs with  $P < 5 \times 10^{-7}$   
329 in the discovery cohort nominally replicated in CCLS. The lead SNP after meta-analyzing the  
330 discovery cohort and the replication cohort of CCLS was rs79226025 ( $P_{CCLS} = 3.04 \times 10^{-2}$ ,  
331  $P_{CCLS+discovery} = 6.81 \times 10^{-9}$ ; Supplementary Table S2). For the *NRBF2 / JMJDIC* locus, we did  
332 not observe an association in the replication cohorts.

### 333 334 **Novel secondary signals at known loci**

335 We performed conditional analyses adjusting for the lead SNP at each of the known and novel  
336 loci to test for independent secondary associations contributing to ALL risk. Using a genome-  
337 wide significance threshold of  $P < 5 \times 10^{-8}$ , we identified a secondary signal in four out of the 16  
338 previously known loci (Table 2, Figure 3). In all cases, the LD between the secondary hit and the  
339 top hit in the locus are low (Table 2). The additional second associations in *CDKN2A* and *IZKF1*  
340 loci were previously noted<sup>18</sup>. In *CEBPE* (rs60820638,  $P = 5.38 \times 10^{-8}$ ) and 17q12 (rs12944882,  
341  $P = 7.71 \times 10^{-10}$ ), these secondary signals represent novel associations. In particular, at the *CEBPE*  
342 locus, previous reports suggest multiple correlated variants with functional evidence<sup>39,40</sup>. Our  
343 analysis is consistent with the two previous variants (rs2239635 and rs2239630) being or tagging  
344 the same underlying signal, while the secondary association we identified (rs60820638) is an  
345 independent association (Supplementary Table S3). In the case of 17q12 the lead SNP in our

346 discovery GWAS is the novel association, as the conditional analysis revealed the previously  
347 known SNP at the locus. The LD between the two associated SNPs is low ( $r^2 = 0.02$ ). None of  
348 the loci tested showed residual association surpassing genome-wide significance threshold after  
349 conditioning on the first or second associated variants, and none of the three putatively novel loci  
350 showed additional association in conditional analysis.

## 351 352 **Polygenic Risk Score**

353  
354 To assess the combined effect of all identified risk alleles for ALL, we constructed an ALL PRS  
355 model in our discovery cohort, using either the 18 SNPs from 16 previously known loci or the 23  
356 known plus novel SNPs (including the novel conditional hits) and their associated effect sizes  
357 from the trans-ethnic meta-analysis in CCRLP/GERA. We then computed the PRS for NLW and  
358 LAT individuals in CCLS and COG, as they are the largest ethnic groups available across CCLS,  
359 COG/WTCCC, and our discovery cohort. The scores generated with the known risk loci were  
360 significantly associated with case-control status in all groups ( $P_{\text{CCLS NLW}}=2.22 \times 10^{-17}$ ,  $P_{\text{CCLS}}$   
361  $\text{LAT}=4.78 \times 10^{-23}$ ,  $P_{\text{COG/WTCCC}}=2.99 \times 10^{-62}$ , Supplementary Table S4). Adding the three novel loci  
362 identified in this study and the two novel secondary signals further strengthened the evidence of  
363 the association in COG/WTCCC ( $P=6.93 \times 10^{-63}$ ) and CCLS LAT ( $P=5.75 \times 10^{-24}$ ), while the  
364 evidence of association stayed about the same in CCLS NLW ( $P=2.03 \times 10^{-17}$ ). The predictive  
365 accuracy as measured by AUC are similar between NLW and LAT, at around 67-68%, consistent  
366 with the hypothesis that trans-ethnic meta-analysis will enable PRS to be more transferrable  
367 between populations.

368  
369 Also, we explored the distribution of PRS in CCRLP individuals (Supplementary Figure S1). We  
370 found that while the shape of the PRS distribution is consistent with a normal distribution  
371 (Kolmogorov-Smirnov  $P=0.918$  and  $0.303$  for LAT and NLW, respectively) and appears  
372 similar between LAT and NLW (standard deviation of  $0.728$  and  $0.735$  respectively; F-Test  $P=$   
373  $0.633$ ), the scores in LAT are shifted to the right compared to the scores in NLW (mean of  $5.101$   
374 and  $4.641$  respectively, Welch t-test  $P=1.3 \times 10^{-122}$ ). The observed pattern was consistent when  
375 the scores were stratified by case-control status (mean of  $5.324$  and  $4.881$  in LAT and NLW  
376 cases, respectively,  $P=3.956 \times 10^{-58}$ ; mean of  $4.895$  and  $4.414$  in LAT and NLW controls,  
377 respectively, with  $P=1.493 \times 10^{-78}$ ). This observation was also replicated in CCLS with mean of  
378  $5.119$  in LAT and  $4.607$  in NLW ( $P=4.596 \times 10^{-51}$ ). Therefore, results from our PRS analyses are  
379 consistent with the notion that differences in allele frequency of ALL risk loci between  
380 populations may complement other non-genetic factors for ALL risk, and partly explain the  
381 increased ALL risk in LAT relative to NLW children and LAT.

## 382 383 **Genetic architecture of ALL in Latinos and non-Latino whites**

384  
385 We estimated the relative contributions of each variant to ALL risk by computing the familial  
386 relative risk (Supplementary Table 5). In our discovery cohort (CCRLP/GERA), the known risk  
387 variants account for 22.9% and 21.7% familial relative risk in LAT and NLW respectively, while  
388 the addition of the novel variants increased this estimate to 25.9% and 24.6%, respectively. In  
389 CCLS, where effect size estimates are expected to be less biased by winner's curse, the pattern is  
390 similar: 22.7% and 23.2% explained in LAT and NLW using known risk variants, and 24.3%

391 and 24.8% explained in LAT and NLW using both known and novel variants (Supplemental  
392 Table S5).

393  
394 We also estimated the heritability of ALL attributable to all common SNPs ( $MAF \geq 0.05$ ) using  
395 the GCTA-LDMS framework.<sup>34</sup> We estimated the heritability to be 20.3% in NLW and 4.1% in  
396 LAT (Supplemental Table S6A). The low estimate in LAT remained with using only the CCRLP  
397 cohort (Supplemental Table S6C). The low estimates could be unreliable because of the admixed  
398 nature of LAT (see Discussion). The estimated heritability in NLW is consistent with that  
399 previous reported<sup>18</sup>. Because the imputation quality using HRC reference panel is expected to be  
400 high for low frequency variants between 1-5% MAF in NLW, our dataset also provides the  
401 opportunity to estimate the stratified contribution by allele frequency to the heritability of ALL  
402 in NLW. When low frequency variants are included, the estimated heritability in NLW increased  
403 to 29.8% (16.2% due to common variants, 13.5% due to low frequency variants; Supplemental  
404 Table S6B). Furthermore, we sought to measure the genetic correlation for ALL between NLW  
405 and LAT, using bivariate GREML analysis implemented in GCTA. The genetic correlation was  
406 high ( $r_G = 0.714 \pm$  standard error 0.130) but significantly different from 1 ( $P = 0.014$ ,  
407 Supplementary Table 7), indicating the genetic architectures may be similar as expected from  
408 correlated effect sizes (Supplementary Figure S2) but not perfectly concordant. Taken at face  
409 value, this may suggest that there may be ethnic-specific genetic risk profiles or differential  
410 interactions with the environment that contributes to differences in disease risk between NLW  
411 and LAT, although it may be subject to similar concerns as the low univariate estimate due to  
412 admixture.

413  
414 Finally, we further characterized the genetic architecture of ALL in NLW and LAT by  
415 estimating the number of population-specific and shared causal alleles using the program  
416 PESCA<sup>36</sup>. The PESCA framework defines the set of causal variants as all variants tested to have  
417 a non-zero effect, even if the effect is indirect and only statistical rather than biological in nature.  
418 Using this framework, we estimated that approximately 1.71% of common SNPs have nonzero  
419 effects in both NLW and LAT, and that 1.69% and 1.87% had population-specific nonzero  
420 effects in NLW and LAT, respectively. By dividing the genome into 1,653 approximately  
421 independent LD regions (Methods), the mean expected numbers of population-specific/shared  
422 causal SNPs were 13.86 (SD 7.23) NLW-specific, 15.32 (SD 8.00) LAT-specific, and 14.02 (SD  
423 7.32) shared by the two populations (Supplementary Figure S3).

## 424 425 426 **DISCUSSION**

427  
428 In summary, we have performed the largest trans-ethnic meta-analysis GWAS of childhood ALL  
429 to date. We incorporated data across four ethnic groups (2,191 AFR, 5,335 EAS, 10,288 LAT,  
430 and 58,503 NLW individuals) and identified three putatively novel susceptibility loci. In  
431 addition, conditional analyses identified novel secondary associations with ALL in two  
432 previously reported loci. Our analysis suggests that the known and novel ALL risk alleles  
433 together explained about 25% of the familial relative risk in both NLW and LAT populations,  
434 and that the trans-ethnic PRS we constructed, although relatively simple and utilizing only the  
435 genome-wide associated variants, performed similarly in both NLW and LAT in predicting ALL  
436 (AUC  $\sim$  67-68%).

437  
438 While the three putatively novel risk loci were not consistently replicated, possibly due to small  
439 sample sizes in our replication cohorts and population differences in SNP risk effects, each of the  
440 three loci harbors genes and/or variants with reported functions in hematopoiesis and  
441 leukemogenesis that support a potential role in ALL etiology. Among the set of significantly  
442 associated SNPs ( $P_{\text{meta}} < 5 \times 10^{-7}$ ) in the three putatively novel loci, annotations from HaploReg  
443 (version 4.1)<sup>41</sup> and GTEx portal<sup>42</sup> provided insights of the biological basis of these novel  
444 associations. The associated variants in 6q23 are located between *HBSIL* and *MYB*, a  
445 myeloblastosis oncogene that encodes a critical regulator protein of lymphocyte differentiation  
446 and hematopoiesis<sup>43</sup>. This locus is already well known for associations with multiple blood cell  
447 measurements, severity of major hemoglobin disorders, and  $\beta$ -thalassemia, with multiple  
448 putative functional variants reported<sup>44,45</sup>. The *HBSIL-MYB* intergenic variants are also known to  
449 reduce transcription factor binding, affect long-range interaction with *MYB*, and impact *MYB*  
450 expression. The lead SNP rs9376090 is in a predicted enhancer region in K562 leukemia cells  
451 and GM12878 lymphoblastoid cells, and is a known GWAS hit for platelet count<sup>43</sup> and  
452 hemoglobin concentration<sup>46,47</sup>. Also, it is an eQTL for *ALDH8A1* in lymphocytes and whole  
453 blood<sup>42</sup>. *ALDH8A1* encodes aldehyde dehydrogenases, a cancer stem cell marker and a regulator  
454 self-renewal, expansion, and differentiation.

455  
456 One of the associated loci in 10q21 has a distinct haplotype structure, with 130 highly correlated  
457 SNPs ( $r^2 > 0.8$ ) associated with ALL. This haplotype structure is observed in LAT and EAS, and  
458 the associations are driven by alleles with higher frequency in LAT and EAS than NLW or AFR  
459 (Supplementary Table S1, Supplementary Figure S4). This 400kb region is rich with genetic  
460 variants associated with blood cell traits such as platelet count, myeloid white cell count, and  
461 neutrophil percentage of white cells<sup>48,49</sup>. It is also associated with IL-10 levels<sup>50</sup> which was  
462 shown to be in deficit in ALL cases<sup>51</sup>. The signal region is contained within the intron of  
463 *JMJD1C*, a histone demethylase that a recent study has found to regulate abnormal metabolic  
464 processes in AML<sup>52</sup>. Previous studies have found that it acts as a coactivator for key transcription  
465 factors to ensure survival of AML cells<sup>53</sup> and self-renewal of mouse embryonic stem cells<sup>54</sup>.  
466 Moreover, several significantly associated variants in this region found in our study alter binding  
467 motif of some important transcription factors such as Pax5 and TCF12(ref.<sup>41</sup>).

468  
469 The second locus in 10q21 contains intronic variants in the *TET1* gene, which is well known for  
470 its oncogenicity in several malignancies including AML<sup>55</sup>. A recent study showed the epigenetic  
471 regulator *TET1* is highly expressed in T-cell ALL and is crucial for human T-ALL cell growth in  
472 vivo<sup>56</sup>. We investigated whether there is a stronger association of this locus with T-ALL with  
473 subtype-stratified analysis using a subset of cases in CCRLP with subtype information. The locus  
474 appears to be associated in both T-ALL and B-ALL and we observed a trend of slightly higher  
475 association for T-ALL, but the difference is not statistically significant, likely due to only a small  
476 number of T-ALL cases available (Supplemental Table S8). Although the associated locus  
477 overlaps *TET1*, the most associated SNPs in our meta-analysis were observed as eQTLs of  
478 *DNA2*, *SLC25A16*, *STOX1* in whole blood or lymphoblastoid cells<sup>57</sup>; the role of these genes in  
479 leukemia has not been explored, and we also cannot verify whether the SNPs may affect *TET1*  
480 expression in hematopoietic stem or progenitor cells. Of the four significant variants in this  
481 locus, SNP rs58627364 lies in the promoter region of *TET1* while the remaining three variants  
482 did not appear to overlap functional elements (Supplementary Figure S5). Further, rs58627364 is



483 reported to bind to POL2, CCNT2, ETS1, HEY1, and HMGN3 in K562 cells in ENCODE data,  
484 and also significantly alters BCL, BDP1 and NF-kappa B binding motifs. The second locus in  
485 10q21 contains intronic variants in the *TET1* gene, which is well known for its oncogenicity in  
486 several malignancies including AML<sup>55</sup>. A recent study showed the epigenetic regulator *TET1* is  
487 highly expressed in T-cell ALL and is crucial for human T-ALL cell growth in vivo<sup>56</sup>. We  
488 investigated whether there is a stronger association of this locus with T-ALL with subtype  
489 stratified analysis using a small number of cases in CCRLP with subtype information available  
490 (Supplemental Table S8). The locus appears to be associated with both T-ALL and B-ALL and  
491 we observed a trend of slightly higher association for T-ALL, but the difference is not  
492 statistically significant, possibly due to a small number of T-ALL cases.

493  
494 In addition to the discovery of putative novel ALL risk loci, we also capitalized on the large  
495 numbers of Latinos and non-Latino whites included in our study to explore the genetic  
496 architecture of ALL in these two populations, by estimating the heritability explained and the  
497 proportion of population-specific and shared causal alleles. In the NLW population, we estimated  
498 that 20.3% of the heritability of ALL was attributed to common imputed variants using GCTA-  
499 LDMS (Supplementary Table S6A). The estimated heritability increased to 29.8%  
500 (Supplementary Table S6B) if low frequency variants down to MAF of 1% were included,  
501 suggesting that there are additional low frequency variants associated with ALL that may be  
502 discovered in larger scaled studies. However, it is puzzling that the estimated heritability was so  
503 low in LAT (4.1% in univariate analysis, and 7.3% in bivariate analysis; Supplementary Table  
504 S6A, 7). Because the accuracy of imputation at low frequency variants is expected to be  
505 significantly worse in LAT (due to the underrepresentation of Native American or other non-  
506 European haplotypes in HRC panel), a priori we did not estimate the heritability including low-  
507 frequency variants in LAT. However, when we did attempt to estimate heritability in this setting,  
508 we obtain a strongly negative heritability estimates, suggesting blatant model instability or  
509 misspecification, likely attributed to the admixed nature of LAT<sup>58</sup>. This thus brings in question  
510 whether the 4-7% estimates from common variant analysis are robust and accurate. Because the  
511 estimated familial relative risk summed over GWAS loci between NLW and LAT are similar  
512 (Supplementary Table S5), and the estimated effect sizes at known associated loci are highly  
513 correlated ( $r_2 = 0.819$ ; Supplementary Figure S2), we suspect the heritability in Latino  
514 population may be underestimated with the standard REML approach. Our observation suggests  
515 that further efforts to develop a framework to robustly estimate heritability in complex admixed  
516 populations are needed, such as extending model proposed in Zaitlin et al.<sup>59</sup> to 3-way admixed  
517 scenarios.

518  
519 As a consequence of the potential bias in heritability estimates in LAT, our estimated genetic  
520 correlation between LAT and NLW should be interpreted with caution. On the surface, our  
521 estimated genetic correlation ( $r_G = 0.71$ ) is significantly less than 1, suggesting that there are  
522 significant population-specific components of the disease architecture between LAT and NLW.  
523 This would be consistent with the findings of the *ERG* locus<sup>15,16</sup>, a Latino-specific locus  
524 associated with ALL, and suggest that future ethnic-specific GWAS across different ethnic  
525 groups for ALL will be insightful. This is also consistent with our observation in the PESCA  
526 analysis, where we estimated the population-specific and shared causal alleles. We found that  
527 only 32.5% of the estimated causal alleles are shared between LAT and NLW. This contrasts  
528 starkly with the previous investigation of nine complex traits using PESCA between East Asian



529 and European populations, where most of the causal alleles are shared between populations  
530 across all 9 traits. The result of the PESCA analysis could be partly explained by drastic  
531 difference in power between LAT and NLW currently in our study, and that generally the sample  
532 sizes for ALL are still significantly lower than the complex traits examined in Shi et al.<sup>36</sup>  
533 Another factor could be that because the heritability estimates are used to inform PESCA  
534 analysis, a bias in heritability estimates could impact the estimated number of population-  
535 specific and shared causal alleles. Therefore, the genetic architecture for ALL, particularly in  
536 admixed populations like the Latinos, remain unclear and will require more focused effort to  
537 investigate.

538  
539 Future studies aimed to uncover the genetic risk factors for ALL could focus on multiple  
540 avenues. First, there will be a need to further increase the sample size of the study cohort, which  
541 would provide additional venues to replicate the putative novel findings here and identify more  
542 associated loci. Second, there should be a focus on ethnic-specific GWAS for ALL, as ethnic-  
543 specific associations could be missed in a trans-ethnic GWAS. An example is the *ERG* locus,  
544 which is not genome-wide significant in our meta-analysis. Finally, while not explored  
545 extensively in this particular study, there should be a focus on disentangling the different  
546 subtypes of ALL, and to study other aspects of the disease pathogenesis such as disease  
547 progression or risk of relapse, though these data are less available and may require more focused  
548 ascertainment and cohort creation.

549

550

#### 551 **DESCRIPTION OF SUPPLEMENTAL DATA**

552 Supplemental Data include five figures and eight tables

553

#### 554 **DATA AVAILABILITY**

555 Any uploading of genomic data and/or sharing of these biospecimens or individual data derived  
556 from these biospecimens has been determined to violate the statutory scheme of the California  
557 Health and Safety Code Sections 124980(j), 124991(b), (g), (h), and 103850 (a) and (d), which  
558 protect the confidential nature of biospecimens and individual data derived from biospecimens.  
559 This study was approved by Institutional Review Boards at the California Health and Human  
560 Services Agency, University of Southern California, Yale University, and the University of  
561 California San Francisco. The de-identified newborn dried blood spots for the CCRLP  
562 (California Biobank Program SIS request # 26) were obtained with a waiver of consent from the  
563 Committee for the Protection of Human Subjects of the State of California.

564

#### 565 **ACKNOWLEDGEMENT**

566 This work was supported by research grants from the National Institutes of Health  
567 (R01CA155461, R01CA175737, R01ES009137, P42ES004705, P01ES018172, P42ES0470518  
568 and R24ES028524) and the Environmental Protection Agency (RD83451101), United States.  
569 The content is solely the responsibility of the authors and does not necessarily represent the  
570 official views of the National Institutes of Health and the EPA. The collection of cancer  
571 incidence data used in this study was supported by the California Department of Public Health as  
572 part of the statewide cancer reporting program mandated by California Health and Safety Code  
573 Section 103885; the National Cancer Institute's Surveillance, Epidemiology and End Results  
574 Program under contract HHSN261201000140C awarded to the Cancer Prevention Institute of

575 California, contract HHSN261201000035C awarded to the University of Southern California,  
576 and contract HHSN261201000034C awarded to the Public Health Institute; and the Centers for  
577 Disease Control and Prevention's National Program of Cancer Registries, under agreement  
578 U58DP003862-01 awarded to the California Department of Public Health. The biospecimens  
579 and/or data used in this study were obtained from the California Biobank Program, (SIS request  
580 #26), Section 6555(b), 17 CCR. The California Department of Public Health is not responsible  
581 for the results or conclusions drawn by the authors of this publication. We thank Hong Quach  
582 and Diana Quach for DNA isolation support. We thank Martin Kharrazi, Robin Cooley, and  
583 Steve Graham of the California Department of Public Health for advice and logistical support.  
584 We thank Eunice Wan, Simon Wong, and Pui Yan Kwok at the UCSF Institute of Human  
585 Genetics Core for genotyping support. This study makes use of data generated by the Wellcome  
586 Trust Case-Control Consortium. A full list of the investigators who contributed to the generation  
587 of the data is available from [www.wtccc.org.uk](http://www.wtccc.org.uk). Funding for the project was provided by the  
588 Wellcome Trust under award 076113 and 085475. Genotype data for COG ALL cases are  
589 available for download from dbGaP (Study Accession: phs000638.v1.p1). Data came from a  
590 grant, the Resource for Genetic Epidemiology Research in Adult Health and Aging (RC2  
591 AG033067; Schaefer and Risch, PIs) awarded to the Kaiser Permanente Research Program on  
592 Genes, Environment, and Health (RPGEH) and the UCSF Institute for Human Genetics. The  
593 RPGEH was supported by grants from the Robert Wood Johnson Foundation, the Wayne and  
594 Gladys Valley Foundation, the Ellison Medical Foundation, Kaiser Permanente Northern  
595 California, and the Kaiser Permanente National and Northern California Community Benefit  
596 Programs. The RPGEH and the Resource for Genetic Epidemiology Research in Adult Health  
597 and Aging are described here:  
598 <https://divisionofresearch.kaiserpermanente.org/genetics/rpgeh/rpgehome>. For recruitment of  
599 subjects enrolled in the CCLS replication set, the authors gratefully acknowledge the clinical  
600 investigators at the following collaborating hospitals: University of California Davis Medical  
601 Center (Dr. Jonathan Ducore), University of California San Francisco (Drs. Mignon Loh and  
602 Katherine Matthay), Children's Hospital of Central California (Dr. Vonda Crouse), Lucile  
603 Packard Children's Hospital (Dr. Gary Dahl), Children's Hospital Oakland (Dr. James Feusner),  
604 Kaiser Permanente Roseville (formerly Sacramento) (Drs. Kent Jolly and Vincent Kiley), Kaiser  
605 Permanente Santa Clara (Drs. Carolyn Russo, Alan Wong, and Denah Taggart), Kaiser  
606 Permanente San Francisco (Dr. Kenneth Leung), and Kaiser Permanente Oakland (Drs. Daniel  
607 Kronish and Stacy Month). The authors additionally thank the families for their participation in  
608 the California Childhood Leukemia Study (formerly known as the Northern California  
609 Childhood Leukemia Study). Finally, the authors acknowledge the Center for Advanced  
610 Research Computing (CARC; <https://carc.usc.edu>) at the University of Southern California for  
611 providing computing resources that have contributed to the research results reported within this  
612 publication.

613

#### 614 **DECLARATION OF INTEREST**

615 The authors declare no competing interests.

616 **Table 1.** Summary statistics for the reported variants, the top variant in the loci from our meta-  
617 analysis, and the linkage disequilibrium between the two variants in NLW and LAT.

| Gene           | Reported SNP |           |                                   |                         | Top SNP in this study |           |            |                         | r <sup>2</sup> |      |
|----------------|--------------|-----------|-----------------------------------|-------------------------|-----------------------|-----------|------------|-------------------------|----------------|------|
|                | Chr          | Pos       | rsID (reference)                  | P-value                 | Chr                   | Pos       | rsID       | P-value                 | NLW            | LAT  |
| <i>C5orf56</i> | 5            | 131765206 | rs886285 (ref <sup>18</sup> )     | 0.63                    | 5                     | 131811182 | rs11741255 | 1.69x10 <sup>-4</sup>   | 0.35           | 0.19 |
| <i>BAK1</i>    | 6            | 3354693   | rs1048728818 (ref <sup>18</sup> ) | 4.49x10 <sup>-8</sup>   | 6                     | 33546837  | rs210142   | 4.27 x10 <sup>-8</sup>  | 1              | 1    |
| <i>IKZF1</i>   | 7            | 50470604  | rs4132601 (ref <sup>5</sup> )     | 1.13x10 <sup>-33</sup>  | 7                     | 50477144  | rs10230978 | 3.92 x10 <sup>-34</sup> | 0.98           | 0.97 |
| 8q24           | 8            | 130156143 | rs4617118 (ref <sup>4</sup> )     | 1.04 x10 <sup>-12</sup> | Same                  |           |            |                         |                |      |
| <i>CDKN2A</i>  | 9            | 21970916  | rs3731249 (ref <sup>27</sup> )    | 1.29x10 <sup>-18</sup>  | 9                     | 21975319  | rs36228834 | 1.90 x10 <sup>-18</sup> | 0.99           | 1    |
| <i>TLE1</i>    | 9            | 83747371  | rs76925697 (ref <sup>18</sup> )   | 5.37x10 <sup>-2</sup>   | 9                     | 83728588  | rs62579826 | 1.06 x10 <sup>-2</sup>  | 0.81           | 0.98 |
| <i>GATA3</i>   | 10           | 8104208   | rs3824662 (ref <sup>6</sup> )     | 4.24x10 <sup>-9</sup>   | Same                  |           |            |                         |                |      |
| <i>PIP4K2A</i> | 10           | 22852948  | rs7088318 (ref <sup>8</sup> )     | 6.50x10 <sup>-19</sup>  | 10                    | 22853102  | rs7075634  | 2.42 x10 <sup>-19</sup> | 0.96           | 0.97 |
| <i>BMI1</i>    | 10           | 22423302  | rs11591377 (ref <sup>28</sup> )   | 8.21x10 <sup>-10</sup>  | 10                    | 22374489  | rs1926697  | 5.24 x10 <sup>-10</sup> | 0.84           | 0.88 |
| <i>ARID5B</i>  | 10           | 63723577  | rs10821936 (ref <sup>7</sup> )    | 4.78x10 <sup>-67</sup>  | 10                    | 63721176  | rs7090445  | 7.36 x10 <sup>-70</sup> | 0.98           | 0.99 |
| <i>LHPP</i>    | 10           | 126293309 | rs35837782 (ref <sup>3</sup> )    | 6.90x10 <sup>-4</sup>   | Same                  |           |            |                         |                |      |
| <i>ELK3</i>    | 12           | 96612762  | rs4762284 (ref <sup>3</sup> )     | 2.42x10 <sup>-3</sup>   | 12                    | 96645605  | rs78405390 | 4.68 x10 <sup>-5</sup>  | 0.13           | 0.22 |
| <i>CEBPE</i>   | 14           | 23589057  | rs2239633 (ref <sup>5</sup> )     | 3.0 x10 <sup>-14</sup>  | 14                    | 23589349  | rs2239630  | 2.12 x10 <sup>-21</sup> | 0.74           | 0.78 |
| <i>IKZF3</i>   | 17           | 38066240  | rs2290400 (ref <sup>4</sup> )     | 2.09 10 <sup>-6</sup>   | 17                    | 37957235  | rs17607816 | 1.42 x10 <sup>-7</sup>  | 0.02           | 0.22 |
| <i>IGF2BP1</i> | 17           | 47092076  | rs10853104 (ref <sup>18</sup> )   | 2.93x10 <sup>-2</sup>   | 17                    | 47217004  | rs6504598  | 4.87 x10 <sup>-4</sup>  | 0.02           | 0.02 |
| <i>ERG</i>     | 21           | 39789606  | rs8131436 (ref <sup>16</sup> )    | 6.97x10 <sup>-5</sup>   | 21                    | 39784752  | rs55681902 | 9.36 x10 <sup>-6</sup>  | 0.62           | 0.65 |

618 Definition of terms: Reported SNP; variant associated with ALL in previous papers. Out top  
619 SNP: variant with lowest P-value at 1Mb around the reported SNP in the transethnic meta-  
620 analysis; Gene: nearest gene unless the variant is in gene desert. Chr., chromosome; Pos.,  
621 Position in hg19; P-value, logistic regression test value, r<sup>2</sup>: squared correlation of the reported  
622 SNP and our top SNP; NLW: non-Latino white cohort; LAT: Latino cohort

623 **Table 2.** Summary of conditional analysis to identify secondary associations at known loci.  
624

| <b>Gene</b>     | <b>Chr</b> | <b>Pos</b> | <b>rsID</b> | <b>Risk allele</b> | <b>OR</b> | <b>P<sub>conditional</sub></b> | <b>P<sub>discovery</sub></b> | <b>r<sup>2</sup></b> |
|-----------------|------------|------------|-------------|--------------------|-----------|--------------------------------|------------------------------|----------------------|
| <i>IKZF1</i>    | 7          | 50459043   | rs78396808  | A                  | 1.632     | 3.46x10 <sup>-26</sup>         | 2.7x10 <sup>-16</sup>        | *0.06                |
| <i>CDKN2A/B</i> | 9          | 21993964   | rs2811711   | T                  | 1.355     | 7.2x10 <sup>-10</sup>          | 1.85x10 <sup>-11</sup>       | 0.01                 |
| <i>CEBPE</i>    | 14         | 23592617   | rs60820638  | A                  | 1.193     | 5.38x10 <sup>-8</sup>          | 0.102                        | 0.16                 |
| <i>IZKF3</i>    | 17         | 37983492   | rs12944882  | T                  | 1.204     | 7.71x10 <sup>-10</sup>         | 2.81x10 <sup>-7</sup>        | 0.02                 |

625 For each of the four significant association after conditional analysis, we show the genomic  
626 coordinates in hg19, effect size (OR), the P-values with or without conditioning on the lead SNP  
627 from the discovery meta-analysis in the locus, and the r<sup>2</sup> between the lead SNP and secondary  
628 association.

629 Chr., chromosome; Pos., Position in hg19; OR: Effect size; P<sub>conditional</sub>: p-value from the  
630 conditional analysis; P<sub>discovery</sub>: p –value from meta-analysis without conditioning on any SNP; r<sup>2</sup>:  
631 squared correlation of the conditioned SNP and the most significantly associated SNP from  
632 conditional analysis.

633 \*calculated in Latino population as the variant was filtered out for low MAF in NLW cohort.

634 **REFERENCES**

- 635 1. Giddings, B. M., Whitehead, T. P., Metayer, C. & Miller, M. D. Childhood leukemia incidence in  
636 California: High and rising in the Hispanic population: Hispanic Childhood Leukemia Incidence.  
637 *Cancer* **122**, 2867–2875 (2016).
- 638 2. Lim, J. Y.-S., Bhatia, S., Robison, L. L. & Yang, J. J. Genomics of racial and ethnic disparities in  
639 childhood acute lymphoblastic leukemia. *Cancer* **120**, 955–962 (2014).
- 640 3. Vijayakrishnan, J. *et al.* A genome-wide association study identifies risk loci for childhood acute  
641 lymphoblastic leukemia at 10q26.13 and 12q23.1. *Leukemia* **31**, 573–579 (2017).
- 642 4. Wiemels, J. L. *et al.* GWAS in childhood acute lymphoblastic leukemia reveals novel genetic  
643 associations at chromosomes 17q12 and 8q24.21. *Nat. Commun.* **9**, 286 (2018).
- 644 5. Papaemmanuil, E. *et al.* Loci on 7p12.2, 10q21.2 and 14q11.2 are associated with risk of  
645 childhood acute lymphoblastic leukemia. *Nat. Genet.* **41**, 1006–1010 (2009).
- 646 6. Perez-Andreu, V. *et al.* Inherited GATA3 variants are associated with Ph-like childhood acute  
647 lymphoblastic leukemia and risk of relapse. *Nat. Genet.* **45**, 1494–1498 (2013).
- 648 7. Treviño, L. R. *et al.* Germline genomic variants associated with childhood acute lymphoblastic  
649 leukemia. *Nat. Genet.* **41**, 1001–1005 (2009).
- 650 8. Xu, H. *et al.* Novel susceptibility variants at 10p12.31-12.2 for childhood acute lymphoblastic  
651 leukemia in ethnically diverse populations. *J. Natl. Cancer Inst.* **105**, 733–742 (2013).
- 652 9. Feng, Q. *et al.* Trends in Acute Lymphoblastic Leukemia Incidence in the United States by  
653 Race/Ethnicity From 2000 to 2016. *Am. J. Epidemiol.* kwaa215 (2020)  
654 doi:10.1093/aje/kwaa215.
- 655 10. Linabery, A. M. & Ross, J. A. Trends in childhood cancer incidence in the U.S. (1992-  
656 2004). *Cancer* **112**, 416–432 (2008).
- 657 11. Barrington-Trimis, J. L. *et al.* Trends in childhood leukemia incidence over two decades  
658 from 1992 to 2013. *Int. J. Cancer* **140**, 1000–1008 (2017).
- 659 12. Bhatia, S. *et al.* Racial and ethnic differences in survival of children with acute  
660 lymphoblastic leukemia. *Blood* **100**, 1957–1964 (2002).
- 661 13. Kadan-Lottick, N. S. Survival Variability by Race and Ethnicity in Childhood Acute  
662 Lymphoblastic Leukemia. *JAMA* **290**, 2008 (2003).
- 663 14. Popejoy, A. B. & Fullerton, S. M. Genomics is failing on diversity. *Nature* **538**, 161–164  
664 (2016).
- 665 15. Qian, M. *et al.* Novel susceptibility variants at the ERG locus for childhood acute  
666 lymphoblastic leukemia in Hispanics. *Blood* **133**, 724–729 (2019).
- 667 16. de Smith, A. J. *et al.* Heritable variation at the chromosome 21 gene ERG is associated  
668 with acute lymphoblastic leukemia risk in children with and without Down syndrome. *Leukemia*  
669 **33**, 2746–2751 (2019).



- 670 17. Walsh, K. M. *et al.* A Heritable Missense Polymorphism in *CDKN2A* Confers Strong Risk  
671 of Childhood Acute Lymphoblastic Leukemia and Is Preferentially Selected during Clonal  
672 Evolution. *Cancer Res.* **75**, 4884–4894 (2015).
- 673 18. Vijayakrishnan, J. *et al.* Identification of four novel associations for B-cell acute  
674 lymphoblastic leukaemia risk. *Nat. Commun.* **10**, 5348 (2019).
- 675 19. Martin, A. R. *et al.* Clinical use of current polygenic risk scores may exacerbate health  
676 disparities. *Nat. Genet.* **51**, 584–591 (2019).
- 677 20. Wojcik, G. L. *et al.* Genetic analyses of diverse populations improves discovery for  
678 complex traits. *Nature* **570**, 514–518 (2019).
- 679 21. Mahajan, A. *et al.* *Trans-ancestry genetic study of type 2 diabetes highlights the power*  
680 *of diverse populations for discovery and translation.*  
681 <http://medrxiv.org/lookup/doi/10.1101/2020.09.22.20198937> (2020)  
682 doi:10.1101/2020.09.22.20198937.
- 683 22. The 1000 Genomes Project Consortium. A global reference for human genetic variation.  
684 *Nature* **526**, 68–74 (2015).
- 685 23. the Haplotype Reference Consortium. A reference panel of 64,976 haplotypes for  
686 genotype imputation. *Nat. Genet.* **48**, 1279–1283 (2016).
- 687 24. Genome Aggregation Database Consortium *et al.* The mutational constraint spectrum  
688 quantified from variation in 141,456 humans. *Nature* **581**, 434–443 (2020).
- 689 25. Willer, C. J., Li, Y. & Abecasis, G. R. METAL: fast and efficient meta-analysis of  
690 genomewide association scans. *Bioinformatics* **26**, 2190–2191 (2010).
- 691 26. Marchini, J., Howie, B., Myers, S., McVean, G. & Donnelly, P. A new multipoint method  
692 for genome-wide association studies by imputation of genotypes. *Nat. Genet.* **39**, 906–913  
693 (2007).
- 694 27. Vijayakrishnan, J. *et al.* The 9p21.3 risk of childhood acute lymphoblastic leukaemia is  
695 explained by a rare high-impact variant in *CDKN2A*. *Sci. Rep.* **5**, 15065 (2015).
- 696 28. de Smith, A. J. *et al.* BMI1 enhancer polymorphism underlies chromosome 10p12.31  
697 association with childhood acute lymphoblastic leukemia: *BMI 1* enhancer polymorphism in ALL.  
698 *Int. J. Cancer* **143**, 2647–2658 (2018).
- 699 29. Wellcome Trust Case Control Consortium. Genome-wide association study of 14,000  
700 cases of seven common diseases and 3,000 shared controls. *Nature* **447**, 661–678 (2007).
- 701 30. Metayer, C. *et al.* Tobacco smoke exposure and the risk of childhood acute  
702 lymphoblastic and myeloid leukemias by cytogenetic subtype. *Cancer Epidemiol. Biomark. Prev.*  
703 *Publ. Am. Assoc. Cancer Res. Cosponsored Am. Soc. Prev. Oncol.* **22**, 1600–1611 (2013).
- 704 31. Chang, C. C. *et al.* Second-generation PLINK: rising to the challenge of larger and richer  
705 datasets. *GigaScience* **4**, 7 (2015).

- 706 32. Robin, X. *et al.* pROC: an open-source package for R and S+ to analyze and compare  
707 ROC curves. *BMC Bioinformatics* **12**, 77 (2011).
- 708 33. Yang, J., Lee, S. H., Goddard, M. E. & Visscher, P. M. GCTA: A Tool for Genome-wide  
709 Complex Trait Analysis. *Am. J. Hum. Genet.* **88**, 76–82 (2011).
- 710 34. The LifeLines Cohort Study *et al.* Genetic variance estimation with imputed variants finds  
711 negligible missing heritability for human height and body mass index. *Nat. Genet.* **47**, 1114–  
712 1120 (2015).
- 713 35. the PRACTICAL consortium *et al.* The contribution of rare variation to prostate cancer  
714 heritability. *Nat. Genet.* **48**, 30–35 (2016).
- 715 36. Shi, H. *et al.* Localizing Components of Shared Transethnic Genetic Architecture of  
716 Complex Traits from GWAS Summary Data. *Am. J. Hum. Genet.* **106**, 805–817 (2020).
- 717 37. Berisa, T. & Pickrell, J. K. Approximately independent linkage disequilibrium blocks in  
718 human populations. *Bioinformatics* **btv546** (2015) doi:10.1093/bioinformatics/btv546.
- 719 38. Schumacher, F. R. *et al.* Association analyses of more than 140,000 men identify 63  
720 new prostate cancer susceptibility loci. *Nat. Genet.* **50**, 928–936 (2018).
- 721 39. Wiemels, J. L. *et al.* A functional polymorphism in the CEBPE gene promoter influences  
722 acute lymphoblastic leukemia risk through interaction with the hematopoietic transcription factor  
723 Ikaros. *Leukemia* **30**, 1194–1197 (2016).
- 724 40. Studd, J. B. *et al.* Genetic predisposition to B-cell acute lymphoblastic leukemia at  
725 14q11.2 is mediated by a CEBPE promoter polymorphism. *Leukemia* **33**, 1–14 (2019).
- 726 41. Ward, L. D. & Kellis, M. HaploReg: a resource for exploring chromatin states,  
727 conservation, and regulatory motif alterations within sets of genetically linked variants. *Nucleic  
728 Acids Res.* **40**, D930-934 (2012).
- 729 42. Lonsdale, J. *et al.* The Genotype-Tissue Expression (GTEx) project. *Nat. Genet.* **45**,  
730 580–585 (2013).
- 731 43. Lin, B. D. *et al.* 2SNP heritability and effects of genetic variants for neutrophil-to-  
732 lymphocyte and platelet-to-lymphocyte ratio. *J. Hum. Genet.* **62**, 979–988 (2017).
- 733 44. Stadhouders, R. *et al.* HBS1L-MYB intergenic variants modulate fetal hemoglobin via  
734 long-range MYB enhancers. *J. Clin. Invest.* **124**, 1699–1710 (2014).
- 735 45. Guo, M. H. *et al.* Comprehensive population-based genome sequencing provides insight  
736 into hematopoietic regulatory mechanisms. *Proc. Natl. Acad. Sci.* **114**, E327–E336 (2017).
- 737 46. Astle, W. J. *et al.* The Allelic Landscape of Human Blood Cell Trait Variation and Links to  
738 Common Complex Disease. *Cell* **167**, 1415-1429.e19 (2016).
- 739 47. van Rooij, F. J. A. *et al.* Genome-wide Trans-ethnic Meta-analysis Identifies Seven  
740 Genetic Loci Influencing Erythrocyte Traits and a Role for RBPMS in Erythropoiesis. *Am. J.  
741 Hum. Genet.* **100**, 51–63 (2017).

- 742 48. Tajuddin, S. M. *et al.* Large-Scale Exome-wide Association Analysis Identifies Loci for  
743 White Blood Cell Traits and Pleiotropy with Immune-Mediated Diseases. *Am. J. Hum. Genet.*  
744 **99**, 22–39 (2016).
- 745 49. Buniello, A. *et al.* The NHGRI-EBI GWAS Catalog of published genome-wide association  
746 studies, targeted arrays and summary statistics 2019. *Nucleic Acids Res.* **47**, D1005–D1012  
747 (2019).
- 748 50. Ahola-Olli, A. V. *et al.* Genome-wide Association Study Identifies 27 Loci Influencing  
749 Concentrations of Circulating Cytokines and Growth Factors. *Am. J. Hum. Genet.* **100**, 40–50  
750 (2017).
- 751 51. Chang, J. S. *et al.* Profound deficit of IL10 at birth in children who develop childhood  
752 acute lymphoblastic leukemia. *Cancer Epidemiol. Biomark. Prev. Publ. Am. Assoc. Cancer Res.*  
753 *Cosponsored Am. Soc. Prev. Oncol.* **20**, 1736–1740 (2011).
- 754 52. Lynch, J. R. *et al.* JMJD1C-mediated metabolic dysregulation contributes to HOXA9-  
755 dependent leukemogenesis. *Leukemia* **33**, 1400–1410 (2019).
- 756 53. Chen, M. *et al.* JMJD1C is required for the survival of acute myeloid leukemia by  
757 functioning as a coactivator for key transcription factors. *Genes Dev.* **29**, 2123–2139 (2015).
- 758 54. Xiao, F. *et al.* JMJD1C Ensures Mouse Embryonic Stem Cell Self-Renewal and Somatic  
759 Cell Reprogramming through Controlling MicroRNA Expression. *Stem Cell Rep.* **9**, 927–942  
760 (2017).
- 761 55. Cimmino, L. *et al.* TET1 is a tumor suppressor of hematopoietic malignancy. *Nat.*  
762 *Immunol.* **16**, 653–662 (2015).
- 763 56. Bamezai, S. *et al.* TET1 promotes growth of T-cell acute lymphoblastic leukemia and  
764 can be antagonized via PARP inhibition. *Leukemia* (2020) doi:10.1038/s41375-020-0864-3.
- 765 57. Lappalainen, T. *et al.* Transcriptome and genome sequencing uncovers functional  
766 variation in humans. *Nature* **501**, 506–511 (2013).
- 767 58. Steinsaltz, D., Dahl, A. & Wachter, K. W. On Negative Heritability and Negative  
768 Estimates of Heritability. *Genetics* **215**, 343–357 (2020).
- 769 59. Zaitlen, N. *et al.* Leveraging population admixture to characterize the heritability of  
770 complex traits. *Nat. Genet.* **46**, 1356–1362 (2014).

771

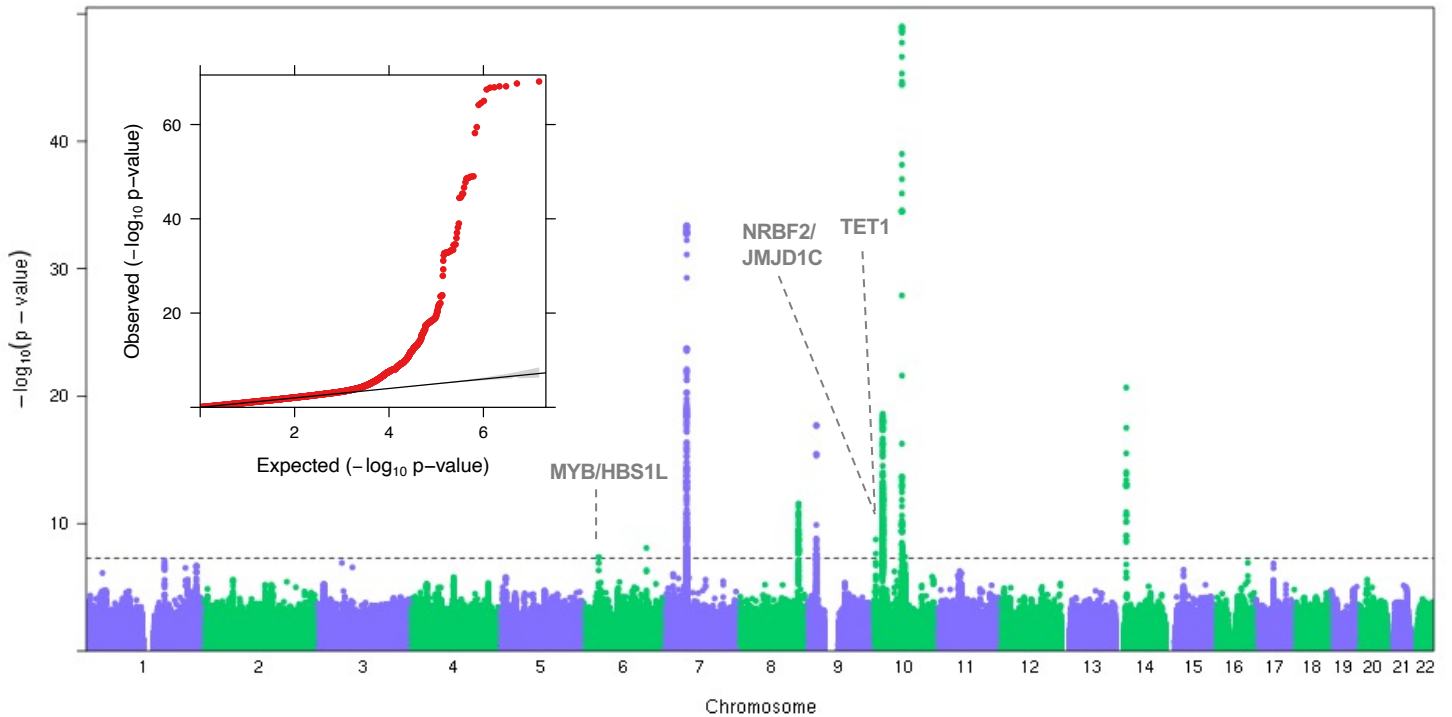

**Figure1. Summary result of the trans-ethnic meta-analysis on ALL.**

Results of the meta-analysis is represented by the Manhattan plot. The novel loci from this study are marked with dotted lines and labeled with the nearest genes. Significance threshold at genome-wide significance level ( $5 \times 10^{-8}$ ) is marked with a horizontal dashed grey line in the Manhattan plot. The y-axis is truncated at  $-\log_{10}(1 \times 10^{-50})$  to improve readability. The insert shows the Quantile-Quantile plot. Deviation from the expected p-value distribution is evident only in the tail. There is little evidence of inflation of the test statistics in general as the genomic inflation factor is 1.024.

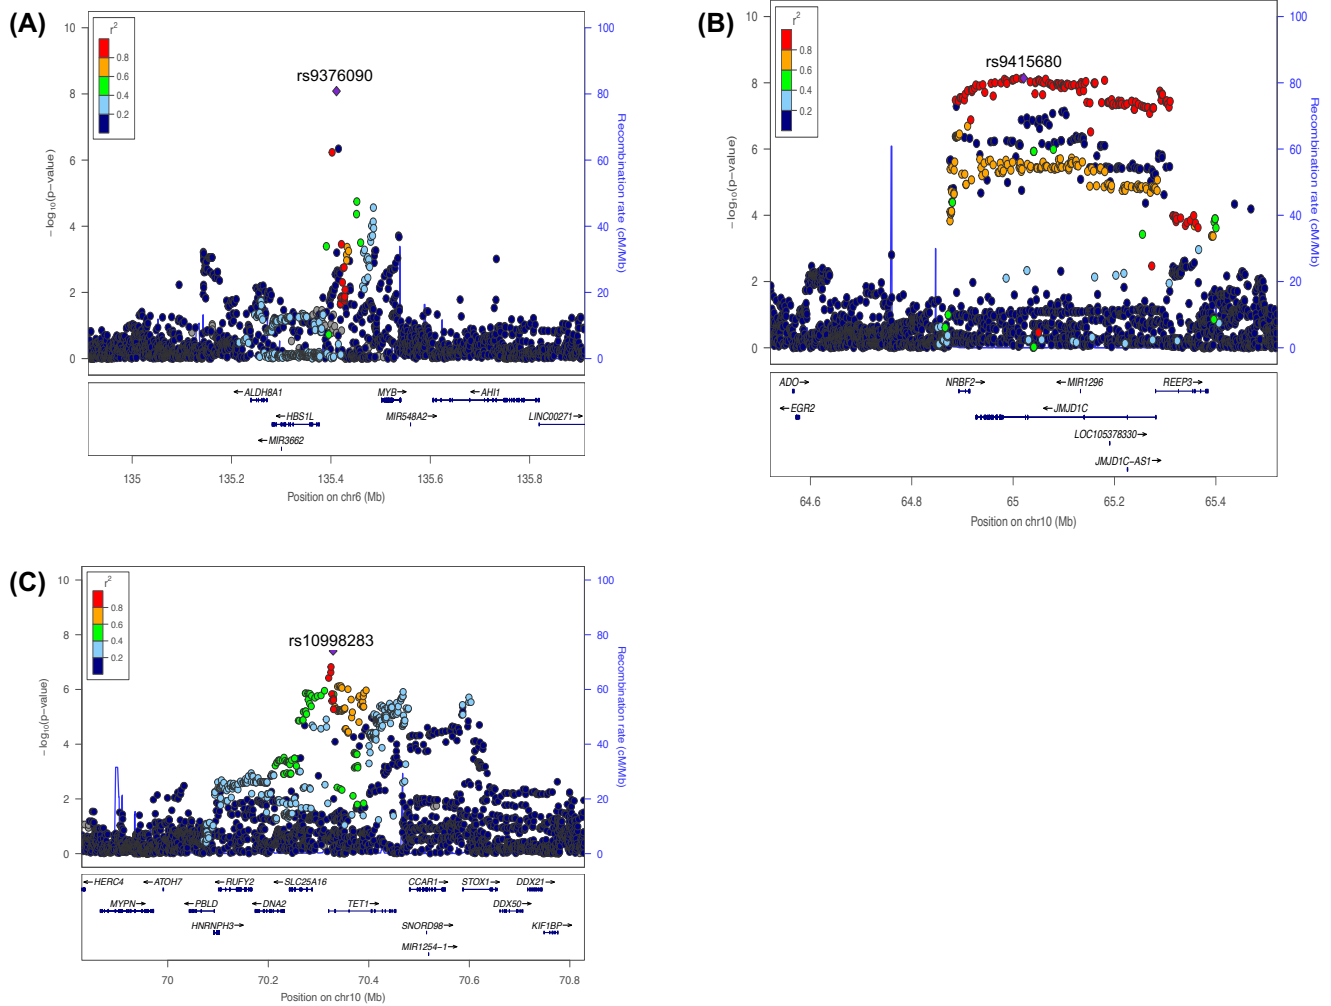

**Figure2. Novel loci associated with childhood ALL in trans-ethnic meta-analysis.**

LocusZoom plots showing 1 Mb region around the identified loci near (A) MYB/HBS1L on chr6, (B) NRBF2/JMJD1C on chr10, and (C) TET1 on chr10 are shown. Diamond symbol indicates the lead SNP in each locus. Color of remaining SNPs is based on linkage disequilibrium (LD) as measured by  $r^2$  with the lead SNP in non-Latino white. All coordinates in x-axis are in hg19.



**(A)**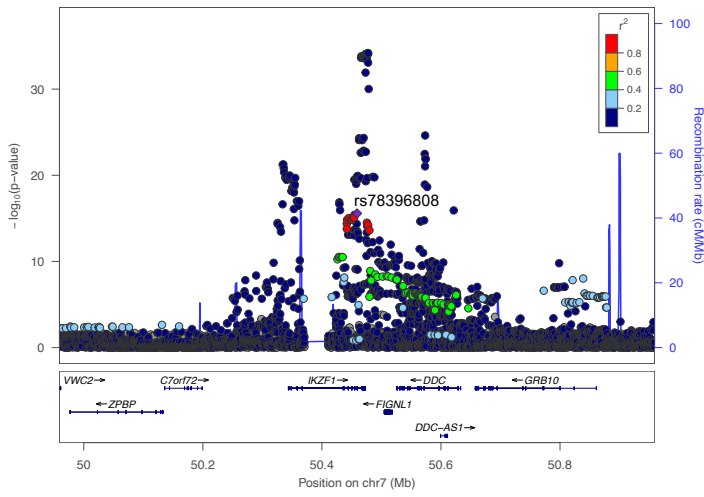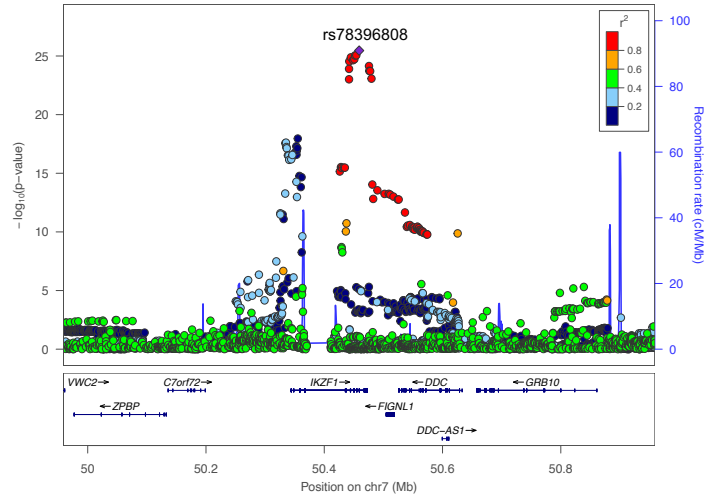**(B)**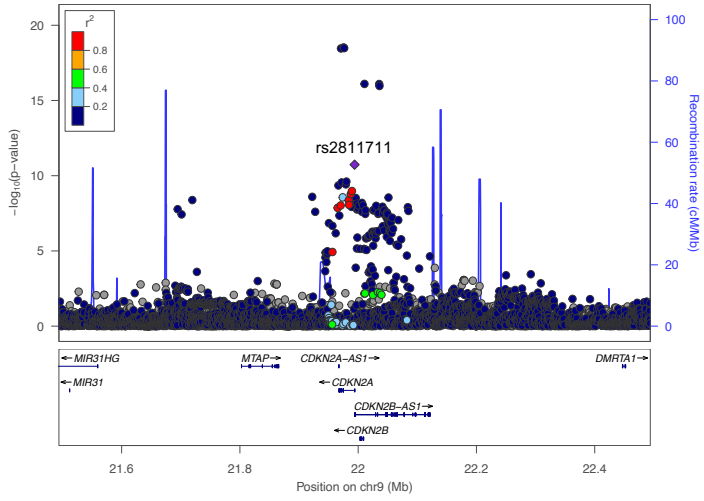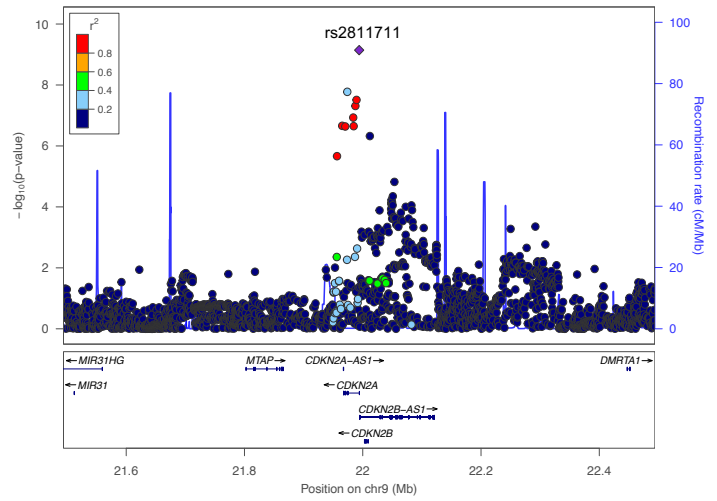**(C)**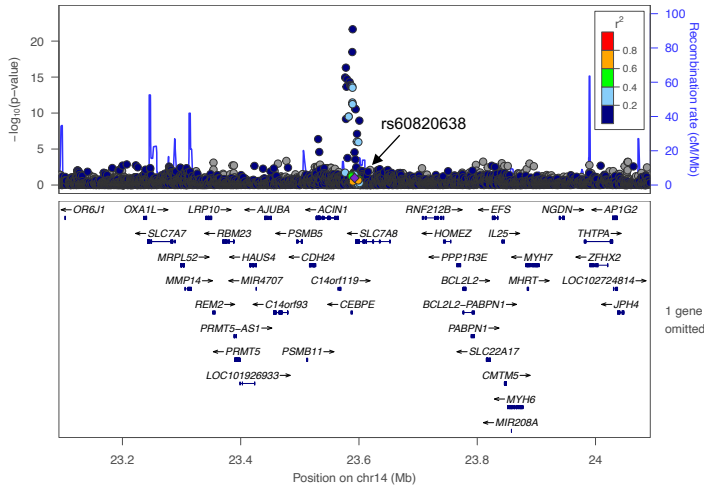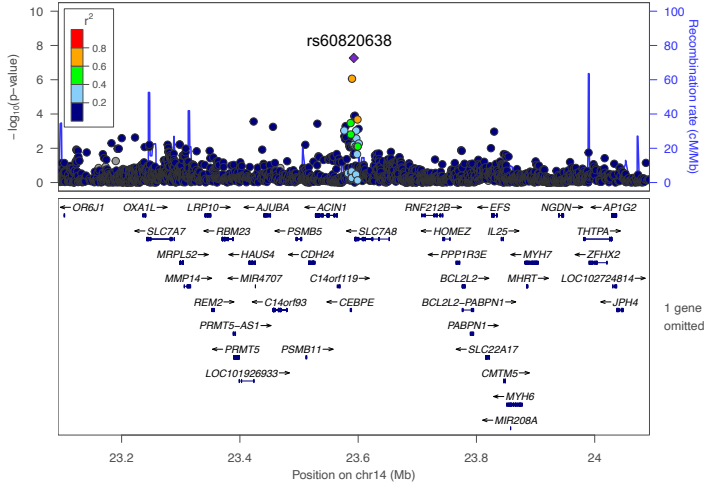**(D)**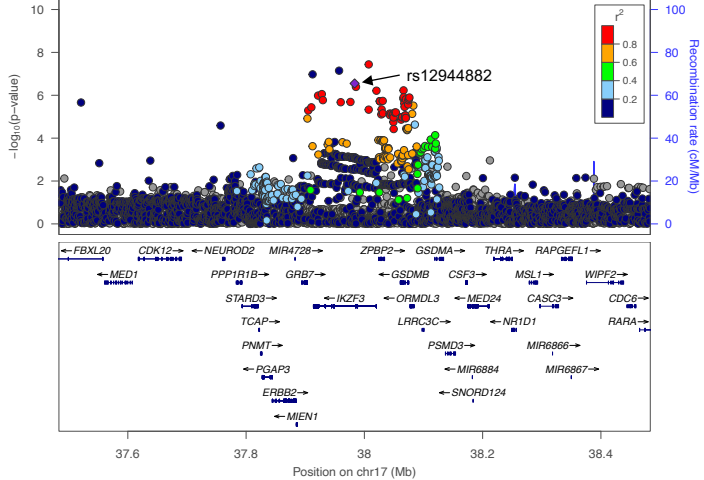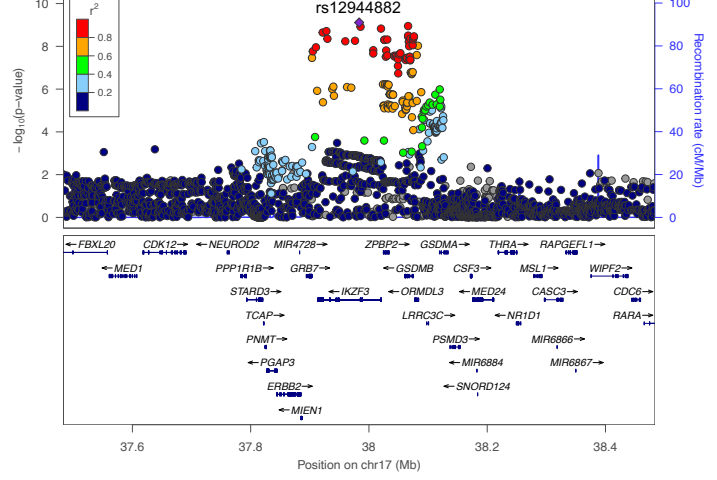

**Figure 3. Secondary association signal ( $p < 5 \times 10^{-8}$ ) with ALL found in previously known loci through conditional analysis.** LocusZoom plot displaying the 1 Mb region found to harbor a second novel variant associated with ALL through conditional analysis: (A) IKZF1 (B) CDKN2A (C) CEBPE (D) IKZF3. For each locus, we display the pattern of association before (left) and after (right) conditioning on the top associated variant in the locus. In both cases, diamond indicates the lead SNP in the conditional analysis. Color of the remaining SNPs is based on linkage disequilibrium (LD) with the lead variant in the conditional analysis in non-Latino white. Genomic coordinates on x-axis are in hg19.
